# Supplementary material for: Mycobacterium tuberculosis complex lineage 5 exhibits high levels of within-lineage genomic diversity and differing gene content compared to the type strain H37Rv
Source: PubMed Central journal article supplement (PMC8477398; doi:10.1099/mgen.0.000437), 2021-07-09
Supplement: mgen-7-0437-s001.pdf [file mgen-7-0437-s001.pdf]

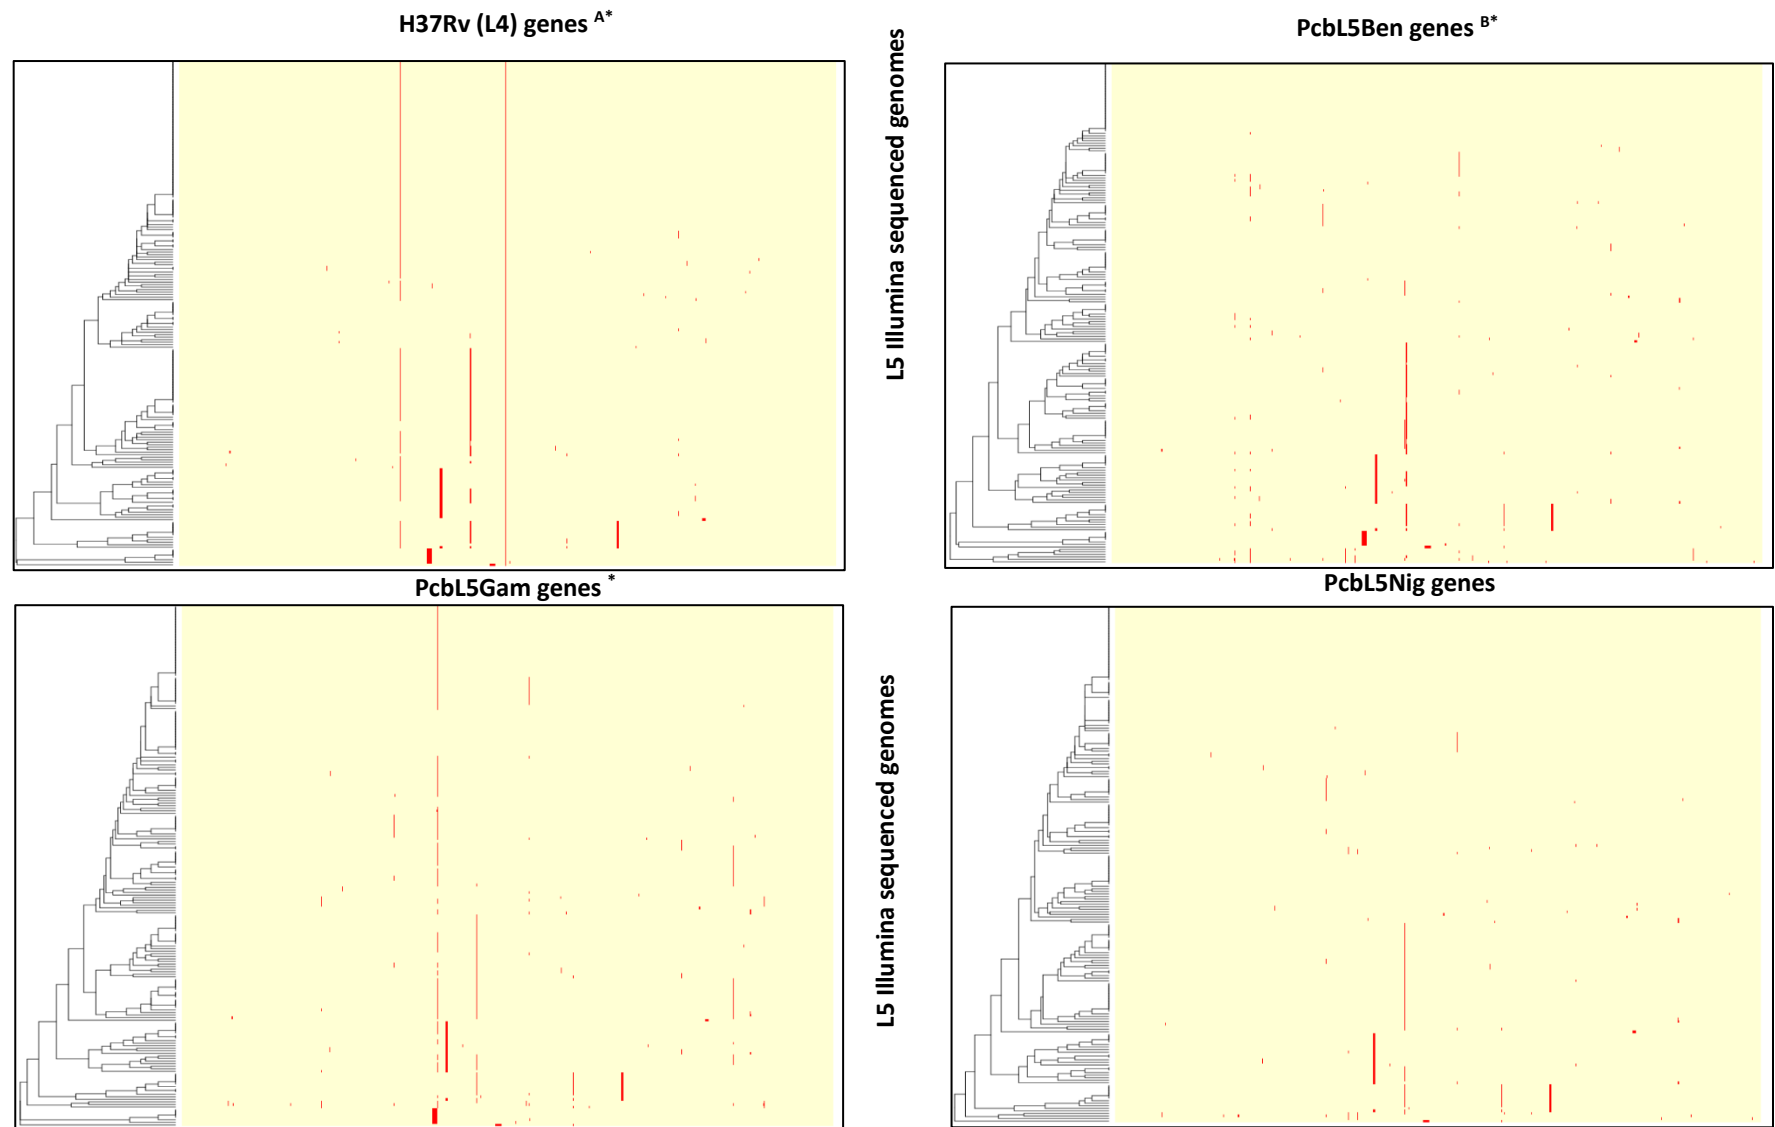

Figure S1. Mapping of 202 clinical (Illumina platform sequenced) genomes (L5\_ig) of *M. africanum* L5 from various countries to *M. tuberculosis* H37Rv (L4) and three *M. africanum* L5 isolates (completed PacBio sequenced genomes) from Benin, The Gambia and Nigeria as reference (PcbL5Ben; PcbL5Gam; PcbL5Nig).

(A) 6/9 genes present in H37Rv but absent in the three L5\_cg were **absent in all 202 L5\_ig**.

(B) 3/3 genes **present in PcbL5Ben but absent in the two other L5 completed PacBio sequenced genomes** were **present in 157/202 L5\_ig**.

\* The 32 genes absent in PcbL5Nig but present in PcbL5Ben, PcbL5Gam and *H37Rv* were also absent in 6/202 L5\_ig (Fig.1).

.... or .... gene absent

**Table S1. Gene difference within the three L5 completed PacBio sequenced genomes from Benin, Nigeria or The Gambia, and between these three genomes and *M. tuberculosis* H37Rv**

| <b>Genes</b>                                  | <b>Present in PcbL5Ben</b>                                                                                                                                                                                                       | <b>Present in PcbL5Gam</b>                                                                                                                                                                                                       | <b>Present in PcbL5Nig</b>                                                                                                                                                                | <b>Present in H37Rv</b>                                                                                                                                                                     |
|-----------------------------------------------|----------------------------------------------------------------------------------------------------------------------------------------------------------------------------------------------------------------------------------|----------------------------------------------------------------------------------------------------------------------------------------------------------------------------------------------------------------------------------|-------------------------------------------------------------------------------------------------------------------------------------------------------------------------------------------|---------------------------------------------------------------------------------------------------------------------------------------------------------------------------------------------|
| <b>Unshared (present in that genome only)</b> | PcbL5Ben_01893,<br>PcbL5Ben_01894,<br>PcbL5Ben_01895,<br>PcbL5Ben_02043,<br>PcbL5Ben_03043                                                                                                                                       | PcbL5Gam_02028,<br>PcbL5Gam_03020                                                                                                                                                                                                | PcbL5Nig_02001                                                                                                                                                                            | H37Rv_02002,<br>H37Rv_02085,<br>H37Rv_02086,<br>H37Rv_02087,<br>H37Rv_02107,<br>H37Rv_02108,<br>H37Rv_02109,<br>H37Rv_02188,<br>H37Rv_02189                                                 |
| <b>Absent in PcbL5Ben</b>                     |                                                                                                                                                                                                                                  | PcbL5Gam_unshared                                                                                                                                                                                                                | PcbL5Nig_unshared                                                                                                                                                                         | H37Rv_unshared                                                                                                                                                                              |
| <b>Suspected pseudogenes in PcbL5Ben</b>      |                                                                                                                                                                                                                                  | PcbL5Gam_00036,<br>PcbL5Gam_00955,<br>PcbL5Gam_02045,<br>PcbL5Gam_03308,<br>PcbL5Gam_03376                                                                                                                                       | PcbL5Nig_00011,<br>PcbL5Nig_00036,<br>PcbL5Nig_00953,<br>PcbL5Nig_01794,<br>PcbL5Nig_01853,<br>PcbL5Nig_01896,<br>PcbL5Nig_02018,<br>PcbL5Nig_02119,<br>PcbL5Nig_02291,<br>PcbL5Nig_02467 | H37Rv_00012,<br>H37Rv_00036,<br>H37Rv_00528,<br>H37Rv_01371,<br>H37Rv_01801,<br>H37Rv_02020,<br>H37Rv_02463,<br>H37Rv_02556,<br>H37Rv_02951,<br>H37Rv_03349,<br>H37Rv_03797                 |
| <b>Absent in PcbL5Gam</b>                     | PcbL5Ben_01443,<br>PcbL5Ben_01444,<br>PcbL5Ben_unshared                                                                                                                                                                          | PcbL5Gam_unshared                                                                                                                                                                                                                | PcbL5Nig_unshared                                                                                                                                                                         | H37Rv_01413,<br>H37Rv_01414,<br>H37Rv_unshared                                                                                                                                              |
| <b>Suspected pseudogenes in PcbL5Gam</b>      | PcbL5Ben_01064,<br>PcbL5Ben_02378,<br>PcbL5Ben_02486,<br>PcbL5Ben_03113                                                                                                                                                          |                                                                                                                                                                                                                                  | PcbL5Nig_00011,<br>PcbL5Nig_01794,<br>PcbL5Nig_01853,<br>PcbL5Nig_01896,<br>PcbL5Nig_02119,<br>PcbL5Nig_02291,<br>PcbL5Nig_02467                                                          | H37Rv_00012,<br>H37Rv_00528,<br>H37Rv_01371,<br>H37Rv_01801,<br>H37Rv_02329,<br>H37Rv_02463,<br>H37Rv_02556,<br>H37Rv_02951,<br>H37Rv_03797,                                                |
| <b>Absent* in PcbL5Nig</b>                    | PcbL5Ben_01616,<br>PcbL5Ben_01617,<br>PcbL5Ben_01618,<br>PcbL5Ben_01619,<br>PcbL5Ben_01620,<br>PcbL5Ben_01621,<br>PcbL5Ben_01622,<br>PcbL5Ben_01623,<br>PcbL5Ben_01624,<br>PcbL5Ben_01625,<br>PcbL5Ben_01626,<br>PcbL5Ben_01627, | PcbL5Gam_01603,<br>PcbL5Gam_01604,<br>PcbL5Gam_01605,<br>PcbL5Gam_01606,<br>PcbL5Gam_01607,<br>PcbL5Gam_01608,<br>PcbL5Gam_01609,<br>PcbL5Gam_01610,<br>PcbL5Gam_01611,<br>PcbL5Gam_01612,<br>PcbL5Gam_01613,<br>PcbL5Gam_01614, |                                                                                                                                                                                           | H37Rv_01580<br>H37Rv_01581,<br>H37Rv_01582,<br>H37Rv_01583,<br>H37Rv_01584,<br>H37Rv_01585,<br>H37Rv_01586,<br>H37Rv_01587,<br>H37Rv_01588,<br>H37Rv_01589,<br>H37Rv_01590,<br>H37Rv_01591, |

|                                                  |                                                                                                                                                                                                                                   |                                                                                                                                                                                                                                    |                                                                                                                                                                                                                                    |
|--------------------------------------------------|-----------------------------------------------------------------------------------------------------------------------------------------------------------------------------------------------------------------------------------|------------------------------------------------------------------------------------------------------------------------------------------------------------------------------------------------------------------------------------|------------------------------------------------------------------------------------------------------------------------------------------------------------------------------------------------------------------------------------|
|                                                  | PcbL5Ben_01628,<br>PcbL5Ben_01629,<br>PcbL5Ben_01630,<br>PcbL5Ben_01631,<br>PcbL5Ben_01632,<br>PcbL5Ben_01633,<br>PcbL5Ben_01634,                                                                                                 | pcbL5Gam_01615,<br>PcbL5Gam_01616,<br>PcbL5Gam_01617,<br>PcbL5Gam_01618,<br>pcbL5Gam_01619,<br>PcbL5Gam_01620,<br>PcbL5Gam_01621,                                                                                                  | H37Rv_01592,<br>H37Rv_01593,<br>H37Rv_01594,<br>H37Rv_01595,<br>H37Rv_01596,<br>H37Rv_01597,<br>H37Rv_01598,                                                                                                                       |
|                                                  | PcbL5Ben_01636,<br>PcbL5Ben_01637,<br>PcbL5Ben_01638,<br>PcbL5Ben_01639,<br>PcbL5Ben_01640,<br>PcbL5Ben_01641,<br>PcbL5Ben_01642,<br>PcbL5Ben_01643,<br>PcbL5Ben_01644,<br>PcbL5Ben_01645,<br>PcbL5Ben_01646                      | PcbL5Gam_01623,<br>PcbL5Gam_01624,<br>PcbL5Gam_01625,<br>pcbL5Gam_01626,<br>PcbL5Gam_01627,<br>PcbL5Gam_01628,<br>PcbL5Gam_01629,<br>PcbL5Gam_01630,<br>PcbL5Gam_01631,<br>PcbL5Gam_01632,<br>pcbL5Gam_01633                       | H37Rv_01600,<br>H37Rv_01601,<br>H37Rv_01602,<br>H37Rv_01603,<br>H37Rv_01604,<br>H37Rv_01605,<br>H37Rv_01606,<br>H37Rv_01607,<br>H37Rv_01608,<br>H37Rv_01609,<br>H37Rv_01610,                                                       |
|                                                  | PcbL5Ben_01891,<br>PcbL5Ben_01892,<br>PcbL5Ben_02248,<br>PcbL5Ben_unshared                                                                                                                                                        | PcbL5Gam_01881,<br>PcbL5Gam_01882,<br>PcbL5Gam_02228,<br>PcbL5Gam_unshared                                                                                                                                                         | H37Rv_01853,<br>H37Rv_01854,<br>H37Rv_02202,<br>H37Rv_unshared                                                                                                                                                                     |
| <b>Suspected<br/>pseudogenes<br/>in PcbL5Nig</b> | PcbL5Ben_01064,<br>PcbL5Ben_01718,<br>PcbL5Ben_02486                                                                                                                                                                              | PcbL5Gam_01705,<br>PcbL5Gam_03308,<br>PcbL5Gam_03376                                                                                                                                                                               | H37Rv_00528,<br>H37Rv_01371,<br>H37Rv_01679,<br>H37Rv_02463,<br>H37Rv_02556,<br>H37Rv_02951,<br>H37Rv_03349,<br>H37Rv_03797                                                                                                        |
| <b>Absent in<br/>H37Rv</b>                       | PcbL5Ben_01364,<br>PcbL5Ben_01365,<br>PcbL5Ben_02129,<br>PcbL5Ben_02130,<br>PcbL5Ben_02043,<br>PcbL5Ben_02181,<br>PcbL5Ben_02182,<br>PcbL5Ben_03555,<br>PcbL5Ben_03556,<br>PcbL5Ben_03557,<br>PcbL5Ben_03669<br>PcbL5Ben_unshared | PcbL5Gam_01359,<br>PcbL5Gam_01360,<br>PcbL5Gam_02112,<br>PcbL5Gam_02113,<br>PcbL5Gam_02028,<br>PcbL5Gam_02163,<br>PcbL5Gam_02164,<br>PcbL5Gam_03527,<br>PcbL5Gam_03528,<br>PcbL5Gam_03529,<br>PcbL5Gam_03643,<br>PcbL5Gam_unshared | PcbL5Nig_01357,<br>PcbL5Nig_01358,<br>PcbL5Nig_02085,<br>PcbL5Nig_02086,<br>PcbL5Nig_02001,<br>PcbL5Nig_02137,<br>PcbL5Nig_02138,<br>PcbL5Nig_03500,<br>PcbL5Nig_03503,<br>PcbL5Nig_03504,<br>PcbL5Nig_03616,<br>PcbL5Nig_unshared |
| <b>Suspected<br/>pseudogenes<br/>in H37Rv</b>    | PcbL5Ben_00749,<br>PcbL5Ben_00828,<br>PcbL5Ben_01064,<br>PcbL5Ben_01108,<br>PcbL5Ben_02128,<br>PcbL5Ben_02486,                                                                                                                    | PcbL5Gam_00750,<br>PcbL5Gam_00826,<br>PcbL5Gam_00955,<br>PcbL5Gam_01103,<br>PcbL5Gam_01879,<br>PcbL5Gam_02111,                                                                                                                     | PcbL5Nig_00748,<br>PcbL5Nig_00824,<br>PcbL5Nig_00953,<br>PcbL5Nig_01100,<br>PcbL5Nig_01846,<br>PcbL5Nig_01853,                                                                                                                     |

---

|                 |                 |                 |
|-----------------|-----------------|-----------------|
| PcbL5Ben_03113, | PcbL5Gam_03117, | PcbL5Nig_01896, |
| PcbL5Ben_03141, | PcbL5Gam_03308, | PcbL5Nig_02084, |
| PcbL5Ben_03667  | PcbL5Gam_03641  | PcbL5Nig_02119, |
|                 |                 | PcbL5Nig_02291, |
|                 |                 | PcbL5Nig_02467, |
|                 |                 | PcbL5Nig_03064, |
|                 |                 | PcbL5Nig_03092, |
|                 |                 | PcbL5Nig_03614  |

---

\*Genes highlighted in the same color are contiguous and form a block.

**Table S2. Presence /absence in 202 L5 isolates Illumina sequenced genomes of the 11 genes shared by the three L5 completed genomes but absent in the *M. tuberculosis* H37Rv genome.** The 4 genes present in all L5 strains but absent in H37Rv are presented in the grey-background lines of the table.

| Genes present in L5 completed PacBio sequenced genomes but absent in H37Rv | Length (bp) | Present in L5 isolates Illumina sequenced genome n=202 (%) | SNP in L5-specific genes  |                           |                           | Gene function                                         | Present in complete genome of                                     |                                                                                                                                                                                                                                                                                                                     |                |
|----------------------------------------------------------------------------|-------------|------------------------------------------------------------|---------------------------|---------------------------|---------------------------|-------------------------------------------------------|-------------------------------------------------------------------|---------------------------------------------------------------------------------------------------------------------------------------------------------------------------------------------------------------------------------------------------------------------------------------------------------------------|----------------|
|                                                                            |             |                                                            | PcbL5Ben as ref n=202 (%) | PcbL5Gam as ref n=202 (%) | PcbL5Nig as ref n=202 (%) |                                                       |                                                                   |                                                                                                                                                                                                                                                                                                                     |                |
|                                                                            |             |                                                            |                           |                           |                           | Functional group (Mycobrowser)                        | genes                                                             | Summary of role based on the literature                                                                                                                                                                                                                                                                             |                |
| PcbL5Ben_1364                                                              | 546 bp      | 188 (93.1)                                                 |                           |                           |                           | ABC transporter ATP-binding protein/permease (Prokka) | Transmembrane ATP-binding protein ABC transporter                 | Conserved domains: FHA and CcmA (NCBI)<br>FHA (forkhead associated domain, COG1716 (T)) binds pSer, pThr, pTyr (Signal transduction mechanisms)<br>CcmA (COG1131 (V)), ABC-type multidrug transport system, ATPase component (Defense mechanisms (NCBI))                                                            | L5, bovis      |
| PcbL5Ben_1365                                                              | 1902 bp     | 188 (93.1)                                                 |                           |                           |                           | Same as PcbL5Ben_1364                                 | Same as PcbL5Ben_1364                                             | Same as PcbL5Ben_1364                                                                                                                                                                                                                                                                                               | L5, bovis      |
| PcbL5Ben_2043                                                              | 150 bp      | 192 (95)                                                   |                           |                           |                           | Hypothetical protein                                  | Hypothetical protein                                              |                                                                                                                                                                                                                                                                                                                     |                |
| PcbL5Ben_2129#                                                             | 648 bp      | <b>202 (100)</b>                                           | 4 (2)                     | 4 (2)                     | 202* (100)                | <b>PE/PPE</b>                                         | PPE                                                               |                                                                                                                                                                                                                                                                                                                     | <b>Only L5</b> |
| PcbL5Ben_2130#                                                             | 600 bp      | <b>202 (100)</b>                                           | 7 (3.5)                   | 7 (3.5)                   | 7 (3.5)                   | Not in Mycobrowser                                    | <b>Hypothetical protein possibly CAAX conserved domain (NCBI)</b> | Involved in post-translation modification by attaching to the isoprenoid proteins in the process called prenylation (NCBI). Most of CAAX box proteins do not have a transmembrane domain, thus, the prenylation process is crucial for the function of many signal transduction proteins (Gao, Liao, and Yang 2009) | <b>Only L5</b> |

|                      |         |                  |         |         |         |                                                                    |                                                                        |                                                                                                                                                                                              |               |
|----------------------|---------|------------------|---------|---------|---------|--------------------------------------------------------------------|------------------------------------------------------------------------|----------------------------------------------------------------------------------------------------------------------------------------------------------------------------------------------|---------------|
| <b>PcbL5Ben_2181</b> | 237 bp  | <b>202 (100)</b> | 3 (1.5) | 3 (1.5) | 3 (1.5) | Not in Mycobrowser                                                 | <b>Hypothetical protein, possibly IS256 transposase</b> (90% id, NCBI) | IS256 transposase is implicated in resistance to antibiotics and virulence (recombination for adaptation, invasion)(Murugesan et al. 2018; Gu et al. 2005)                                   | L5, L6, bovis |
| <b>PcbL5Ben_2182</b> | 897 bp  | <b>202 (100)</b> | 6 (3)   | 6 (3)   | 6 (3)   | <b>Unknown function (Mb2048c)</b><br>Belongs to <i>RvD1</i> region | <i>Mb2048c</i> (belongs to <i>RvD1</i> region)                         | Function unknown (expressed during exponential growth in Sauton's minimal media (NCBI)). Gene absent in H37Rv (Mycobrowser)                                                                  | L5, L6, bovis |
| <b>PcbL5Ben_3555</b> | 1137 bp | 164 (81.2)       |         |         |         | Intermediary metabolism and respiration                            | moaA3 (NCBI)                                                           | <i>moaA3</i> (molybdenum cofactor biosynthesis protein subunit MoaA , Cyclic pyranopterin monophosphate synthase (Prokka)) is contained in an IS6110 sequence deleted in H37Rv (Mycobrowser) | L5, L6, bovis |
| <b>PcbL5Ben_3556</b> | 1146 bp | 162 (80.2)       |         |         |         | Not in Mycobrowser                                                 | Hypothetical protein, possibly DnrI superfamily (NCBI)                 | <i>DnrI</i> : DNA binding transcriptional activator of the SARP family (signal transduction mechanisms, COG3629 (NCBI))                                                                      | L5, L6, bovis |
| <b>PcbL5Ben_3557</b> | 438 bp  | 162 (80.2)       |         |         |         | Peptide synthase (Prokka)                                          | Hypothetical protein, possibly IS6110 transposase (99-100% id NCBI)    |                                                                                                                                                                                              | L5, L6, bovis |
| <b>PcbL5Ben_3669</b> | 396 bp  | 198 (98)         |         |         |         | PE/PPE                                                             | Hypothetical protein                                                   |                                                                                                                                                                                              | L5, L6        |

Ref: reference ; bp: base pair

\*In total 207 in the 202 L5 Illumina sequenced genomes: more than one SNP in the gene for some strains

# Present in L5 only, not present in L6 nor *M. bovis*. Those two genes (PcbL5Ben\_2129 and 2130) are adjacent.

PcbL5Ben\_1364 and PcbL5Ben\_1365 are adjacent genes

PcbL5Ben\_2181 and PcbL5Ben\_2182 are adjacent genes

PcbL5Ben\_3555, PcbL5Ben\_3556 and PcbL5Ben\_3557 are adjacent genes

**Table S3. Presence/absence in 202 Illumina sequenced L5 genomes of the nine genes present in the H37Rv genome but absent in the three completed L5 genomes.** The 4 genes absent in all L5 strains but present in H37Rv are presented in the grey-background lines of the table.

| Genes present in H37Rv but absent in L5 completed PacBio sequenced genomes | Length (bp) | Present in L5 isolates Illumina sequence d genomes n=202 (%) | Absent in L5 isolates Illumina sequence d genomes n=202 (%) | Gene function                                                                                           |                                                                                                                                                        |                                                                                                                                                                                    | Absent in complete genome of | Present in complete genome of |
|----------------------------------------------------------------------------|-------------|--------------------------------------------------------------|-------------------------------------------------------------|---------------------------------------------------------------------------------------------------------|--------------------------------------------------------------------------------------------------------------------------------------------------------|------------------------------------------------------------------------------------------------------------------------------------------------------------------------------------|------------------------------|-------------------------------|
|                                                                            |             |                                                              |                                                             | Functional group (Mycobrowser)                                                                          | Genes                                                                                                                                                  | Summary of role based on the literature                                                                                                                                            |                              |                               |
| <b>Part of Rv1899c (H37Rv_2002)</b>                                        | 105 bp      | 201 (99.5)                                                   | 1 (0.5)                                                     | Hypothetical protein (35 aa) part of <i>Rv1899c</i> (343 aa, Cell wall and cell processes)(Tuberculist) | Hypothetical protein, part of Rv1899c (LppD: 4-hydroxybuturate dehydrogenase 173 aa) and also LpqI beta-hexoaminidase precursor (Herrmann et al. 2000) | Possibly bacterial membrane lipoprotein (LppD and LpqI)                                                                                                                            | L5, L6, bovis                | <b>H37Rv only</b>             |
| <b>Rv1977 (H37Rv_2085)</b>                                                 | 1047 bp     | 0                                                            | 202 (100)                                                   | Conserved hypotheticals                                                                                 | M48 peptidase family protein including as homologs: CAAX prenyl protease ( <i>Htpx</i> (COG0501 O, heat shock stress response protein) M48-Ste24p-like | Bacterial survival (bacterial self-degradation to eliminate abnormal membrane proteins, <i>htpx</i> upregulated at high temperature, and also after 96 hours of starvation (NCBI)) | <b>L5 only</b>               | L6, bovis, H37Rv              |
| <b>Rv1978 (H37Rv_2086)</b>                                                 | 849 bp      | 2 (1)                                                        | 200 (99)                                                    | Conserved hypotheticals,                                                                                | M48-2C-Ste24p (100% id), class I SAM-dependent methyltransferase (99.65% id), type 11 methyltransferase (97.1% id)                                     | Bacterial survival in macrophages, and non-essential for in vitro growth of H37Rv (Rengarajan, Bloom, and Rubin 2005)(Mycobrowser, Tuberculist)                                    | L5 only                      | L6, bovis, H37Rv              |
| <b>Rv1979c (H37Rv_2087)</b>                                                | 1446 bp     | 0                                                            | 202 (100)                                                   | Cell wall and cell processes                                                                            | APC family permease                                                                                                                                    | -Involved in the transport of <b>clofazimine</b> (and <b>bedaquiline</b> ),                                                                                                        | <b>L5 only</b>               | L6, bovis, H37Rv              |



|                             |        |          |                  |                                                |                                                        |                                                                                                                                                                                                                                                                                                                                                                                                                                                                                                           |                |                   |
|-----------------------------|--------|----------|------------------|------------------------------------------------|--------------------------------------------------------|-----------------------------------------------------------------------------------------------------------------------------------------------------------------------------------------------------------------------------------------------------------------------------------------------------------------------------------------------------------------------------------------------------------------------------------------------------------------------------------------------------------|----------------|-------------------|
|                             |        |          |                  |                                                |                                                        | associated with clofazimine and bedaquiline resistance (Zhang et al. 2015; Ghodousi et al. 2019)-Disruption of the gene provides an in vitro growth advantage to H37Rv                                                                                                                                                                                                                                                                                                                                    |                |                   |
| <b>Rv1993c (H37Rv_2107)</b> | 273 bp | <b>0</b> | <b>202 (100)</b> | <b>Conserved hypotheticals</b>                 | <i>Rv0968=DUF1490</i> similar to <i>Rv1993c</i> (NCBI) | Similar to <i>Rv0968</i> which is included in the operon <i>cosR-Rv0968-ctpV</i> where <i>cosR</i> and <i>ctpV</i> are virulence associated (Rademacher and Masepohl 2012)                                                                                                                                                                                                                                                                                                                                | <b>L5 only</b> | L6, bovis, H37Rv  |
| <b>Rv1994c (H37Rv_2108)</b> | 357 bp | 1 (0.5)  | 201 (99.5)       | Regulatory proteins                            | HTH transcriptional regulator <i>cmtR</i>              | Operon <i>cmtR-Rv1993c-ctpG</i> is similar to <i>csor-Rv0968-ctpV</i> .<br><br><i>cmtR (Rv1994c)</i> has the same role as <i>csor</i> .<br><br>These operons all function in the regulation and transport (efflux) of toxic metal especially copper which is toxic in excess (Samanovic et al. 2012).<br><br>Disruption may hamper in vitro growth, and survival during chronic phase of infection as <i>csor</i> absence (Marcus et al. 2016; Rowland and Niederweis 2012; Ward, Hoye, and Talaat 2008). | L5 only        | L6, bovis, H37Rv  |
| <b>Rv1995 (H37Rv_2109)</b>  | 729 bp | <b>0</b> | <b>202 (100)</b> | <b>Conserved hypothetical</b>                  | <b>Hemerythrin-domain containing protein (NCBI)</b>    | - Involved in oxygen transport (NCBI)                                                                                                                                                                                                                                                                                                                                                                                                                                                                     | <b>L5 only</b> | L6, bovis, H37Rv  |
| <b>Rv2073c (H37Rv_2188)</b> | 750 bp | <b>0</b> | <b>202 (100)</b> | <b>Intermediary metabolism and respiration</b> | <b>Probable short chain dehydrogenase</b>              | SDR family NAD(P)-dependent oxidoreductase (NCBI): catalyzes a wide range of reactions and substrate(Kavanagh et al. 2008; Sellés Vidal et al. 2018)                                                                                                                                                                                                                                                                                                                                                      | L5, L6, bovis  | <b>H37Rv only</b> |

|                                |        |       |                  |                                                                           |                                                                                                                                                                                                |                                                                                                                                                                                                                                                                                                          |               |            |
|--------------------------------|--------|-------|------------------|---------------------------------------------------------------------------|------------------------------------------------------------------------------------------------------------------------------------------------------------------------------------------------|----------------------------------------------------------------------------------------------------------------------------------------------------------------------------------------------------------------------------------------------------------------------------------------------------------|---------------|------------|
| <b>Rv2074<br/>(H37Rv_2189)</b> | 408 bp | 0 (0) | <b>202 (100)</b> | <b>Intermediary metabolism and respiration<br/>(Pyridoxamine, Vit B6)</b> | <b>Pyridoxamine-5-phosphate oxidase (Mycobrowser, Tuberculist, NCBI)<br/>Its cofactor (Selengut and Haft 2010) F420 dependent biliverdin reductase (99.2-100% id, NCBI)(Ahmed et al. 2016)</b> | - Biosynthesis of (pyridoxal phosphate and) pyridoxine (vitamin B6, Mycobrowser) which is essential for survival and virulence of M. tuberculosis (Dick et al. 2010)<br>- Its cofactor implicated in Immuno-evasive mechanism to allow bacterial persistence (Ahmed et al. 2016; Selengut and Haft 2010) | L5, L6, bovis | H37Rv only |
|--------------------------------|--------|-------|------------------|---------------------------------------------------------------------------|------------------------------------------------------------------------------------------------------------------------------------------------------------------------------------------------|----------------------------------------------------------------------------------------------------------------------------------------------------------------------------------------------------------------------------------------------------------------------------------------------------------|---------------|------------|

**Table S4. Verification of genes in the L5 completed PacBio sequenced genomes suspected to be pseudogenes in *M. tuberculosis* H37Rv genome.**

| Gene | Gene in PcbL5Ben         | Gene in PcbL5Gam         | Gene in PcbL5Nig              | Length (aa) | Locus in H37Rv   | Remarks                                                                    | Conclusion                 |
|------|--------------------------|--------------------------|-------------------------------|-------------|------------------|----------------------------------------------------------------------------|----------------------------|
| 1    | PcbL5Ben_00749           | PcbL5Gam_00750           | PcbL5Nig_00748                | 101         | 798857-799150    | M1V, L96p, H97t, del NCD (aa 99-101)                                       | <b>Pseudogene in H37Rv</b> |
| 2    | PcbL5Ben_00828           | PcbL5Gam_00826           | PcbL5Nig_00824                | 34          | 863155-863256    | No change                                                                  | Not pseudogene in H37Rv    |
| 3    | Not suspected pseudogene | PcbL5Gam_00955           | PcbL5Nig_00953                | 204         | 993212-992602    | Inverted, M1V                                                              | <b>Pseudogene in H37Rv</b> |
| 4    | PcbL5Ben_01064           | Not suspected pseudogene | Not suspected pseudogene      | 34          | 1102546-1102647  | S23r                                                                       | Not pseudogene in H37Rv    |
| 5    | PcbL5Ben_01108           | PcbL5Gam_01103           | PcbL5Nig_01100                | 70          | 1148218-1148397  | M1V                                                                        | <b>Pseudogene in H37Rv</b> |
| 6    | PcbL5Ben_01889           | PcbL5Gam_01879           | PcbL5Nig_01846                | 68          | 1981341-1981341  | M1V                                                                        | <b>Pseudogene in H37Rv</b> |
| 7    | PcbL5Ben_02128           | PcbL5Gam_02111           | PcbL5Nig_02084                | 92          | 2219418-2219318  | Inverted, alignment showed aa 59-92, no mutation                           | <b>Pseudogene in H37Rv</b> |
| 8    | Not suspected pseudogene | Not suspected pseudogene | PcbL5Nig_01853 is PcbNig_1896 | 41          | 2038813-2038706  | Inverted, alignment showed aa 59-92, no mutation                           | <b>Pseudogene in H37Rv</b> |
| 9    | PcbL5Ben_02486           | Not suspected pseudogene | Not suspected pseudogene      | 41          | 2582440-2582318  | Inverted, M1V                                                              | <b>Pseudogene in H37Rv</b> |
| 10   | PcbL5Ben_03141           | PcbL5Gam_03117           | PcbL5Nig_03092                | 111         | 3291532-3291350  | Inverted, del aa 1-aa60 (60 first aa)                                      | <b>Pseudogene in H37Rv</b> |
| 11   | Not suspected pseudogene | Not suspected pseudogene | PcbL5Nig_02119                | 46          | 2256620-2256483  | Inverted, No change                                                        | <b>Pseudogene in H37Rv</b> |
| 12   | Not suspected pseudogene | Not suspected pseudogene | PcbL5Nig_02291                | 33          | 24345567-2434665 | No change                                                                  | Not pseudogene in H37Rv    |
| 13   | Not suspected pseudogene | Not suspected pseudogene | PcbL5Nig_02467                | 94          | 2614352-2614071  | Inverted                                                                   | <b>Pseudogene in H37Rv</b> |
| 14   | PcbL5Ben_03113           | Not suspected pseudogene | PcbL5Nig_03060                | 204         | 3232652-3232867  | Del aa1-aa56, N74D, del aa129-aa204                                        | <b>Pseudogene in H37Rv</b> |
| 15   | Not suspected pseudogene | PcbL5Gam_03308           | Not suspected pseudogene      | 58          | 3487871-3487698  | Inverted, M1V                                                              | <b>Pseudogene in H37Rv</b> |
| 16   | PcbL5Ben_03667           | PcbL5Gam_03641           | PcbL5Nig_03614                | 99          | 3841840-3842109  | M1V, all aa mutated (insertion substitution) from aa26-aa81, del aa82-aa98 | <b>Pseudogene in H37Rv</b> |

**Table S5. Verification of genes present in H37Rv suspected to be pseudogenes in the L5 completed genomes**

| <b>Gene in H37Rv</b> | <b>Length (aa)</b> | <b>Locus in H37Rv</b> | <b>Locus in PcbL5Ben</b> | <b>Locus in PcbL5Gam</b> | <b>Locus in PcbL5Nig</b> | <b>Remarks</b>           | <b>Conclusion</b>                    |
|----------------------|--------------------|-----------------------|--------------------------|--------------------------|--------------------------|--------------------------|--------------------------------------|
| H37Rv_02463          | 42                 | 2604950-2605078       | 2631987-2632112          | 2614961-2615086          | 2603370-2603495          | No change                | Not pseudogene                       |
| <b>H37Rv_02556</b>   | 67                 | 2718844-2719047       | 2743020-2742820          | 2729937-2729737          | 2716988-2716788          | Inverted, nSNP I66L      | <b>Pseudogene in the 3 Pacbio L5</b> |
| <b>H37Rv_02951</b>   | 55                 | 3115741-3115908       | 3137926-3137762          | 3126133-3125969          | 3112866-3112702          | Inverted, nSNP M1V, L55F | <b>Pseudogene in the 3 Pacbio L5</b> |
| <b>H37Rv_03797</b>   | 200                | 4053036-4053638       | 4076665-4077105          | 4064716-4065156          | 4055914-4056354          | del aa 1-53              | <b>Pseudogene in the 3 Pacbio L5</b> |

**Table S6. Genes absent in the Nigerian completed PacBio sequenced genome (PcbL5Nig) and some L5 isolates Illumina sequenced genomes (n=6), but present in the Benin and Gambian completed PacBio sequenced genomes (PcbL5Ben, PcbL5Gam), H37Rv and all other L5 isolates Illumina sequenced genomes.**

| ID (this study) | Rv number      | Length (bp) | Functional group (Mycobrowser)          | Gene name (Mycobrowser) | Product (Mycobrowser)                                      | Function (Mycobrowser)                                                                                                      |
|-----------------|----------------|-------------|-----------------------------------------|-------------------------|------------------------------------------------------------|-----------------------------------------------------------------------------------------------------------------------------|
| H37Rv_01580     | <i>Rv1493</i>  | 2253 bp     | Lipid metabolism                        | <i>mutB</i>             | Probable methylmalonyl-CoA mutase large subunit MutB (MCM) | Involved in propionic acid fermentation                                                                                     |
| H37Rv_01581     | <i>Rv1494</i>  | 303 bp      | Virulence, detoxification, adaptation   | <i>mazE4</i>            | Possible antitoxin MazE4                                   | Possible mazE4, antitoxin, part of toxin-antitoxin (TA) operon with Rv1495. Non-essential gene for in vitro growth of H37Rv |
| H37Rv_01582     | <i>Rv1495</i>  | 318 bp      | Virulence, detoxification, adaptation   | <i>mazF4</i>            | Possible toxin MazF4                                       | Sequence-specific mRNA cleavage                                                                                             |
| H37Rv_01583     | <i>Rv1496</i>  | 1005 bp     | Cell wall and cell processes            | <i>Rv1496</i>           | Possible transport system kinase                           | Possibly involved in transport (possibly arginine)                                                                          |
| H37Rv_01584     | <i>Rv1497</i>  | 1290 bp     | Intermediary metabolism and respiration | <i>lipL</i>             | Probable esterase LipL                                     | Function unknown, but supposed involvement in lipid metabolism                                                              |
| H37Rv_01585     | <i>Rv1498c</i> | 618 bp      | Intermediary metabolism and respiration | <i>Rv1498c</i>          | Probable methyltransferase                                 | Causes methylation                                                                                                          |
| H37Rv_01586     | <i>Rv1498A</i> | 213 bp      | Conserved hypotheticals                 | <i>Rv1498A</i>          | Conserved protein                                          | Function unknown                                                                                                            |
|                 | <i>Rv1499</i>  | 399 bp      | Conserved hypotheticals                 | <i>Rv1499</i>           | Hypothetical protein                                       | Function unknown                                                                                                            |
| H37Rv_01587     | <i>Rv1500</i>  | 1029 bp     | Intermediary metabolism and respiration | <i>Rv1500</i>           | Probable glycosyltransferase                               | Function unknown                                                                                                            |
| H37Rv_01588     | <i>Rv1501</i>  | 822 bp      | Conserved hypotheticals                 | <i>Rv1501</i>           | Conserved hypothetical protein                             | Function unknown                                                                                                            |
| H37Rv_01589     | <i>Rv1502</i>  | 900 bp      | Unknown                                 | <i>Rv1502</i>           | Hypothetical protein                                       | Function unknown                                                                                                            |
| H37Rv_01590     | <i>Rv1503c</i> | 549 bp      | Conserved hypotheticals                 | <i>Rv1503c</i>          | Conserved hypothetical protein                             | Function unknown                                                                                                            |

|             |                                                                                  |         |                                         |                |                                                              |                                                                                                                    |
|-------------|----------------------------------------------------------------------------------|---------|-----------------------------------------|----------------|--------------------------------------------------------------|--------------------------------------------------------------------------------------------------------------------|
| H37Rv_01591 | <i>Rv1504</i>                                                                    | 600 bp  | Conserved hypotheticals                 | <i>Rv1504c</i> | Conserved hypothetical protein                               | Function unknown                                                                                                   |
| H37Rv_01592 | <i>Rv1505c</i>                                                                   | 666 bp  | Conserved hypotheticals                 | <i>Rv1505c</i> | Conserved hypothetical protein                               | Function unknown. It has some similarity to hypothetical proteins and glycosylases                                 |
| H37Rv_01593 | <i>Rv1506c</i>                                                                   | 501 bp  | Unknown                                 | <i>Rv1506c</i> | Hypothetical protein                                         | Function unknown. Non-essential gene for in vitro growth of H37Rv                                                  |
| H37Rv_01594 | <i>Rv1507A</i>                                                                   | 504 bp  | Unknown                                 | <i>Rv1507A</i> | Hypothetical protein                                         | Function unknown                                                                                                   |
| H37Rv_01595 | <i>Rv1507c</i>                                                                   | 696 bp  | Conserved hypotheticals                 | <i>Rv1507A</i> | Hypothetical protein                                         | Function unknown                                                                                                   |
| H37Rv_01596 | <i>Rv1508c</i>                                                                   | 1800 bp | Cell wall and cell processes            | <i>Rv1508c</i> | Probable membrane protein                                    | Function unknown. Predicted to be in the GT-C superfamily of glycosyltransferases                                  |
| H37Rv_01597 | <i>Rv1508A</i>                                                                   | 636 bp  | Conserved hypotheticals                 | <i>Rv1508A</i> | Conserved hypotheticals                                      | Function unknown. Highly similar to central part of glycosyl transferases from various mycobacteria and eubacteria |
| H37Rv_01598 | <i>Rv1509</i>                                                                    | 882 bp  | Unknown                                 | <i>Rv1509</i>  | Hypothetical protein                                         | Function unknown                                                                                                   |
|             |                                                                                  |         |                                         |                |                                                              |                                                                                                                    |
| H37Rv_01599 | <i>Rv1510</i> (present in PcbL5Nig but missing in the PcbL5Nig-like Illumina L5) | 1299 bp | Cell wall and cell processes            | <i>Rv1510</i>  | Probable conserved membrane protein                          | Function unknown                                                                                                   |
|             |                                                                                  |         |                                         |                |                                                              |                                                                                                                    |
| H37Rv_01600 | <i>Rv1511</i>                                                                    | 1023 bp | Intermediary metabolism and respiration | <i>gmdA</i>    | GDP-D-mannose dehydratase GmdA (GDP-mannose 4,6 dehydratase) | Function unknown, probably involved in nucleotide-sugar metabolism                                                 |
| H37Rv_01601 | <i>Rv1512</i>                                                                    | 969 bp  | Intermediary metabolism and respiration | <i>epiA</i>    | Probable nucleotide-sugar epimerase EpiA                     | Function unknown, probably involved in nucleotide-sugar metabolism                                                 |

|             |                                                                                   |         |                                         |                |                                                                                             |                                                                                                                                                                  |
|-------------|-----------------------------------------------------------------------------------|---------|-----------------------------------------|----------------|---------------------------------------------------------------------------------------------|------------------------------------------------------------------------------------------------------------------------------------------------------------------|
| H37Rv_01602 | <i>Rv1513</i>                                                                     | 732 bp  | Conserved hypotheticals                 | <i>Rv1513</i>  | Conserved protein                                                                           | Function unknown, similar to hypothetical proteins from several organisms                                                                                        |
| H37Rv_01603 | <i>Rv1514c</i>                                                                    | 789 bp  | Conserved hypotheticals                 | <i>Rv1514c</i> | Conserved hypothetical protein                                                              | Function unknown; similar to other hypothetical protein and to putative colanic acid biosynthesis glycosyl transferase                                           |
| H37Rv_01604 | <i>Rv1515c</i>                                                                    | 897 bp  | Conserved hypotheticals                 | <i>Rv1515c</i> | Conserved hypothetical protein                                                              | Function unknown                                                                                                                                                 |
| H37Rv_01605 | <i>Rv1516c</i>                                                                    | 1011 bp | Intermediary metabolism and respiration | <i>Rv1516c</i> | Probable sugar transferase                                                                  | Function unknown, involved in cellular metabolism. Non essential for in vitro growth.                                                                            |
| H37Rv_01606 | <i>Rv1517</i>                                                                     | 765 bp  | Cell wall and cell processes            | <i>Rv1517</i>  | Conserved hypothetical membrane protein                                                     | Function unknown                                                                                                                                                 |
| H37Rv_01607 | <i>Rv1518</i>                                                                     | 960 bp  | Conserved hypotheticals                 | <i>Rv1518</i>  | Conserved hypothetical protein                                                              | possibly glycosyl transferase involved in exopolysaccharide synthesis, similar to several hypothetical proteins and glycosyl transferases from diverse organisms |
| H37Rv_01608 | <i>Rv1519</i>                                                                     | 270 bp  | Conserved hypotheticals                 | <i>Rv1519</i>  | Conserved hypothetical protein                                                              | Function unknown                                                                                                                                                 |
| H37Rv_01609 | <i>Rv1520</i>                                                                     | 1041 bp | Intermediary metabolism and respiration | <i>Rv1520</i>  | Probable sugar transferase                                                                  | Function unknown; thought to be involved in cellular metabolism                                                                                                  |
| H37Rv_01610 | <i>Rv1521</i>                                                                     | 1752 bp | Lipid metabolism                        | <i>fadD25</i>  | Probable fatty-acid-AMP ligase FadD25 (fatty-acid-AMP synthetase) (fatty-acid-AMP synthase) | Function unknown; involved in lipid degradation                                                                                                                  |
| H37Rv_01611 | <i>Rv1522c</i> (present in PcbL5Nig but missing in the PcbL5Nig-like Illumina L5) | 3441 bp | Cell wall and cell processes            | <i>mmpL12</i>  | Probable conserved transmembrane transport protein MmpL12                                   | Function unknown. Thought to be involved in fatty acid transport.                                                                                                |

## References for supplementary materials

- Ahmed, F Hafna, A Elaaf Mohamed, Paul D Carr, Brendon M Lee, Karmen Condic-Jurkic, Megan L O'mara, and Colin J Jackson. 2016. "Rv2074 Is a Novel F 420 H 2-Dependent Biliverdin Reductase in Mycobacterium Tuberculosis." <https://doi.org/10.1002/pro.2975>.
- Dick, Thomas, Ujjini Manjunatha, Barbara Kappes, and Martin Gengenbacher. 2010. "Vitamin B6 Biosynthesis Is Essential for Survival and Virulence of Mycobacterium Tuberculosis." *Molecular Microbiology* 78 (4): 980–88. <https://doi.org/10.1111/j.1365-2958.2010.07381.x>.
- Gao, Juehua, Jie Liao, and Guang-Yu Yang. 2009. "Review Article CAAX-Box Protein, Prenylation Process and Carcinogenesis." *Am J Transl Res*. Vol. 1. [www.ajtr.org/AJTR905003](http://www.ajtr.org/AJTR905003).
- Ghodousi, Arash, Alamdar Hussain Rizvi, Aurangzaib Quadir Baloch, Abdul Ghafoor, Faisal Masood, Mehmood Qadir, Emanuele Borroni, Alberto Trovato, Sabira Tahseen, and Daniela Maria. 2019. "Acquisition of Cross-Resistance to Bedaquiline and Clofazimine Following Treatment for Tuberculosis in 2 Pakistan." <https://doi.org/10.1101/630012>.
- Gu, J, H Li, M Li, C Vuong, M Otto, Y Wen, and Q Gao. 2005. "Bacterial Insertion Sequence IS256 as a Potential Molecular Marker to Discriminate Invasive Strains from Commensal Strains of Staphylococcus Epidermidis." *The Journal of Hospital Infection* 61 (4): 342–48. <https://doi.org/10.1016/j.jhin.2005.04.017>.
- Herrmann, Jean Louis, Robin Delahay, Alex Gallagher, Brian Robertson, and Douglas Young. 2000. "Analysis of Post-Translational Modification of Mycobacterial Proteins Using a Cassette Expression System." *FEBS Letters* 473 (3): 358–62. [https://doi.org/10.1016/S0014-5793\(00\)01553-2](https://doi.org/10.1016/S0014-5793(00)01553-2).
- Kavanagh, K L, H Jcrnvall, B Persson, and U Oppermann. 2008. "The SDR Superfamily: Functional and Structural Diversity within a Family of Metabolic and Regulatory Enzymes" 171: 77. <https://doi.org/10.1007/s00018-008-8588-y>.
- Marcus, Sarah A, Sarah W Sidiropoulos, Howard Steinberg, and Adel M Talaat. 2016. "CsoR Is Essential for Maintaining Copper Homeostasis in Mycobacterium Tuberculosis." <https://doi.org/10.1371/journal.pone.0151816>.
- Murugesan, Saravanan, Stalin Mani, Indhumathy Kuppusamy, and Padma Krishnan. 2018. "Role of Insertion Sequence Element Is256 as a Virulence Marker and Its Association with Biofilm Formation among Methicillin-Resistant Staphylococcus Epidermidis from Hospital and Community Settings in Chennai, South India." *Indian Journal of Medical Microbiology* 36 (1): 124. [https://doi.org/10.4103/ijmm.IJMM\\_17\\_276](https://doi.org/10.4103/ijmm.IJMM_17_276).
- Rademacher, Corinna, and Bernd Masepohl. 2012. "Copper-Responsive Gene Regulation in Bacteria." <https://doi.org/10.1099/mic.0.058487-0>.
- Rengarajan, Jyothi, Barry R Bloom, and Eric J Rubin. 2005. "Genome-Wide Requirements for Mycobacterium Tuberculosis Adaptation and Survival in Macrophages." *PNAS June*. Vol. 7. [www.pnas.org/cgi/doi/10.1073/pnas.0503272102](http://www.pnas.org/cgi/doi/10.1073/pnas.0503272102).
- Rowland, Jennifer L, and Michael Niederweis. 2012. "Resistance Mechanisms of Mycobacterium Tuberculosis against Phagosomal Copper Overload." <https://doi.org/10.1016/j.tube.2011.12.006>.
- Samanovic, Marie I., Chen Ding, Dennis J. Thiele, and K. Heran Darwin. 2012. "Copper in Microbial Pathogenesis: Meddling with the Metal." *Cell Host & Microbe* 11 (2): 106–15. <https://doi.org/10.1016/j.chom.2012.01.009>.



- Selengut, Jeremy D, and Daniel H Haft. 2010. "Unexpected Abundance of Coenzyme F 420-Dependent Enzymes in Mycobacterium Tuberculosis and Other Actinobacteria †." *JOURNAL OF BACTERIOLOGY* 192 (21): 5788–98. <https://doi.org/10.1128/JB.00425-10>.
- Sellés Vidal, Lara, Ciarán L. Kelly, Paweł M. Mordaka, and John T. Heap. 2018. "Review of NAD(P)H-Dependent Oxidoreductases: Properties, Engineering and Application." *Biochimica et Biophysica Acta (BBA) - Proteins and Proteomics* 1866 (2): 327–47. <https://doi.org/10.1016/j.bbapap.2017.11.005>.
- Ward, Sarah K, Elizabeth A Hoye, and Adel M Talaat. 2008. "The Global Responses of Mycobacterium Tuberculosis to Physiological Levels of Copper †." *JOURNAL OF BACTERIOLOGY* 190 (8): 2939–46. <https://doi.org/10.1128/JB.01847-07>.
- Zhang, Shuo, Jiazhen Chen, Peng Cui, Wanliang Shi, Wenhong Zhang, and Ying Zhang. 2015. "Identification of Novel Mutations Associated with Clofazimine Resistance in Mycobacterium Tuberculosis." <https://doi.org/10.1093/jac/dkv150>.

**Table S7. Sublineage information for all included isolates**

| <b>L5 strains</b> | <b>Sublineage</b>        | <b>Remark</b> |
|-------------------|--------------------------|---------------|
| PcbL5Benin        | L5.3 (L5.3.1)            |               |
| PcbL5Gambia       | L5.1.5                   |               |
| PcbL5Nigeria      | L5.3 (L5.3.2)            |               |
| 10451-01          | L5.1.1                   |               |
| 10463-02          | L5.1.1                   |               |
| 10480-01          | L5.1.1                   |               |
| 10519-01          | L5.1.1                   |               |
| 10617-12          | L5.1.1                   |               |
| 10695-13          | unknown (new sublineage) |               |
| 10709-13          | L5.1.1                   |               |
| 11821-03          | unknown (new sublineage) | lacks RD711   |
| BSSE-QGF-22150    | L5.1.3                   |               |
| BSSE-QGF-22151    | L5.1.1                   |               |
| BSSE-QGF-22153    | L5.1.1                   |               |
| BSSE-QGF-22154    | L5.1.4                   |               |
| BSSE-QGF-22155    | L5.1.1                   |               |
| BSSE-QGF-27970    | L5.1.1                   |               |
| BSSE-QGF-28835    | L5.3 (L5.3.2)            |               |
| BSSE-QGF-54153    | unknown (new sublineage) |               |
| BSSE-QGF-78571    | L5.1.4                   |               |
| DRC-072384        | L5.2                     |               |
| ERR019875         | L5.1.2                   |               |
| ERR1023216        | unknown (new sublineage) | lacks RD711   |
| ERR1023217        | L5.1.3                   |               |
| ERR1023218        | unknown (new sublineage) | lacks RD711   |
| ERR1023221        | L5.3 (L5.3.2)            |               |
| ERR1023223        | L5.1.5                   |               |
| ERR1023224        | L5.1.2                   |               |
| ERR1082117        | L5.1.1                   |               |
| ERR1082122        | L5.1.2                   |               |
| ERR1082125        | L5.1.1                   |               |
| ERR1082126        | L5.1.1                   |               |
| ERR1082129        | L5.1.2                   |               |
| ERR1082135        | L5.1.1                   |               |
| ERR1082137        | L5.1.3                   |               |
| ERR1203054        | L5.1.1                   |               |
| ERR1203057        | L5.1.1                   |               |
| ERR1203058        | L5.1.2                   |               |
| ERR1203059        | L5.1.1                   |               |
| ERR1203065        | L5.1.1                   |               |
| ERR1203066        | L5.1.2                   |               |
| 12026-12          | L5.1.1                   |               |
| 1447-02           | unknown (new sublineage) | lacks RD711   |
| 4802-03           | L5.1.4                   |               |
| 5438-02           | L5.1.1                   |               |
| 7491-14           | L5.1.1                   |               |
| BSSE-QGF-22149    | L5.1.2                   |               |
| BSSE-QGF-54138    | L5.1.4                   |               |
| ERR1082120        | L5.1.1                   |               |
| ERR1203068        | L5.1.2                   |               |

|            |                           |                            |
|------------|---------------------------|----------------------------|
| ERR2383621 | L5.1.1                    |                            |
| ERR439939  | L5.1.4                    |                            |
| ERR439964  | L5.1.1                    |                            |
| ERR502505  | L5.1.1+ (Mixed infection) | Excluded from the analysis |
| ERR702407  | L5.1.3                    |                            |
| ERR751308  | L5.1.1                    |                            |
| ERR751348  | L5.1.4                    |                            |
| ERR1203069 | L5.1.4                    |                            |
| ERR1203074 | L5.1.1                    |                            |
| ERR1215463 | unknown (new sublineage)  |                            |
| ERR1215473 | L5.1.5                    |                            |
| ERR1215476 | L5.1.4                    |                            |
| ERR1215477 | L5.1.1                    |                            |
| ERR1215478 | L5.1.2+ (Mixed infection) | Excluded from the analysis |
| ERR1334053 | L5.1.1                    |                            |
| ERR234679  | L5.1.3                    |                            |
| ERR234680  | unknown (new sublineage)  |                            |
| ERR2383619 | L5.1.1                    |                            |
| ERR2383620 | L5.2                      |                            |
| ERR2383622 | L5.3 (L5.3.1)             |                            |
| ERR2383623 | L5.2                      |                            |
| ERR2383624 | L5.2                      |                            |
| ERR2383625 | L5.1.1                    |                            |
| ERR2383626 | L5.2                      |                            |
| ERR2704808 | L5.1.1                    |                            |
| ERR2704809 | L5.1.1                    |                            |
| ERR2704810 | L5.2                      |                            |
| ERR2704812 | L5.2                      |                            |
| ERR439931  | L5.1.3                    |                            |
| ERR439936  | L5.1.5                    |                            |
| ERR439937  | L5.1.2                    |                            |
| ERR439940  | L5.1.5                    |                            |
| ERR439941  | L5.1.4                    |                            |
| ERR439944  | unknown (new sublineage)  |                            |
| ERR439947  | L5.1.5                    |                            |
| ERR439949  | L5.1.4                    |                            |
| ERR439951  | L5.3 (L5.3.2)             |                            |
| ERR439952  | L5.3 (L5.3.1)             |                            |
| ERR439953  | L5.1.5                    |                            |
| ERR439955  | L5.1.4                    |                            |
| ERR439959  | L5.3 (L5.3.2)             |                            |
| ERR439960  | unknown (new sublineage)  |                            |
| ERR439962  | unknown (new sublineage)  |                            |
| ERR439967  | L5.1.1                    |                            |
| ERR439980  | L5.1.1                    |                            |
| ERR439982  | unknown (new sublineage)  |                            |
| ERR439983  | L5.3 (L5.3.1)             |                            |
| ERR439984  | unknown (new sublineage)  |                            |
| ERR439985  | unknown (new sublineage)  |                            |
| ERR460916  | L5.3 (L5.3.1)             |                            |
| ERR502471  | L5.1.1                    |                            |
| ERR502475  | L5.1.1                    |                            |

|           |                           |                            |
|-----------|---------------------------|----------------------------|
| ERR502487 | unknown (new sublineage)  | lacks RD711                |
| ERR502500 | L5.1.1                    |                            |
| ERR502501 | L5.3 (L5.3.2)             |                            |
| ERR502509 | L5.1.5                    |                            |
| ERR502512 | L5.3 (L5.3.2)             |                            |
| ERR502513 | L5.1.4                    |                            |
| ERR502515 | L5.1.1                    |                            |
| ERR502536 | L5.1.4                    |                            |
| ERR550904 | L5.2                      |                            |
| ERR551005 | L5.2                      |                            |
| ERR551566 | unknown (new sublineage)  | lacks RD711                |
| ERR551965 | L5.1.1                    |                            |
| ERR552187 | L5.1.1                    |                            |
| ERR552345 | L5.1.1                    |                            |
| ERR702402 | L5.1.1                    |                            |
| ERR702411 | L5.1.1                    |                            |
| ERR702413 | unknown (new sublineage)  | lacks RD711                |
| ERR702416 | unknown (new sublineage)  |                            |
| ERR702417 | L5.1.1                    |                            |
| ERR702419 | L5.3 (L5.3.1)             |                            |
| ERR702426 | L5.1.1                    |                            |
| ERR751295 | L5.1.4                    |                            |
| ERR751299 | L5.1.1                    |                            |
| ERR751301 | L5.1.1                    |                            |
| ERR751302 | L5.1.1+ (Mixed infection) | Excluded from the analysis |
| ERR751303 | L5.1.1                    |                            |
| ERR751304 | L5.1.3                    |                            |
| ERR751310 | L5.1.3                    |                            |
| ERR751311 | L5.1.5                    |                            |
| ERR751312 | L5.3 (L5.3.1)             |                            |
| ERR751313 | L5.1.1                    |                            |
| ERR751315 | L5.1.3                    |                            |
| ERR751323 | L5.1.4                    |                            |
| ERR751327 | L5.1.1                    |                            |
| ERR751328 | L5.1.1                    |                            |
| ERR751334 | L5.1.1                    |                            |
| ERR751335 | unknown (new sublineage)  | lacks RD711                |
| ERR751339 | L5.1.2                    |                            |
| ERR751345 | L5.1.1                    |                            |
| 12046-12  | L5.1.5                    |                            |
| 12184-03  | unknown (new sublineage)  | lacks RD711                |
| 12910-13  | L5.1.1                    |                            |
| 1410-02   | L5.1.3                    |                            |
| 1413-02   | L5.1.1                    |                            |
| 1426-02   | L5.1.1                    |                            |
| 1437-02   | L5.1.1                    |                            |
| 1440-02   | L5.1.1                    |                            |
| 1465-02   | L5.1.4                    |                            |
| 1473-02   | L5.1.4                    |                            |
| 14741-14  | L5.1.3                    |                            |
| 2568-02   | unknown (new sublineage)  |                            |
| 3377-03   | L5.1.1                    |                            |

|                 |                          |             |
|-----------------|--------------------------|-------------|
| 3482-03         | L5.1.4                   |             |
| 4005-13         | L5.1.1                   |             |
| 4518-03         | L5.1.1                   |             |
| 4804-03         | L5.1.1                   |             |
| 5378-02         | L5.1.1                   |             |
| 5398-02         | L5.1.1                   |             |
| 5404-02         | L5.1.1                   |             |
| 5405-02         | unknown (new sublineage) | lacks RD711 |
| 5417-02         | L5.1.2                   |             |
| 5432-02         | L5.1.2                   |             |
| 5434-02         | L5.1.4                   |             |
| 5441-04         | L5.1.1                   |             |
| 5444-02         | L5.2                     |             |
| 5446-02         | unknown (new sublineage) | lacks RD711 |
| 5447-02         | L5.1.1                   |             |
| 5456-02         | L5.1.1                   |             |
| 5473-02         | L5.1.4                   |             |
| 5475-02         | L5.1.1                   |             |
| 6897-04         | unknown (new sublineage) | lacks RD711 |
| 8076-11         | L5.2                     |             |
| 8103-11         | L5.2                     |             |
| 8137-11         | L5.2                     |             |
| 8214-03         | L5.1.1                   |             |
| 8270-03         | L5.1.1                   |             |
| 8303-02         | L5.1.1                   |             |
| 8876-12         | L5.1.1                   |             |
| 8878-12         | L5.1.1                   |             |
| 8946-13         | L5.1.1                   |             |
| 9858-03         | L5.3 (L5.3.1)            |             |
| BSSE-QGF-108892 | L5.1.1                   |             |
| BSSE-QGF-109560 | L5.1.1                   |             |
| BSSE-QGF-109571 | L5.1.1                   |             |
| BSSE-QGF-109627 | L5.1.1                   |             |
| BSSE-QGF-22108  | unknown (new sublineage) | lacks RD711 |
| BSSE-QGF-22110  | L5.1.3                   |             |
| GR2-CGATGT-L007 | L5.1.1                   |             |
| MTB-DY-135      | L5.1.2                   |             |
| MTB-DY-20       | unknown (new sublineage) | lacks RD711 |
| MTB-DY-26       | L5.3 (L5.3.1)            |             |
| NG-5288-1047301 | L5.1.1                   |             |
| NG-5288-256902  | L5.1.1                   |             |
| NG-5288-533304  | L5.1.1                   |             |
| NG-5288-553604  | L5.1.1                   |             |
| NG-5967-N1063   | unknown (new sublineage) | lacks RD711 |
| NG-6193-N1203   | L5.1.1                   |             |
| SRR2100183      | L5.1.2                   |             |
| SRR2100713      | unknown (new sublineage) | lacks RD711 |
| SRR2101040      | L5.1.2                   |             |
| SRR2101063      | L5.1.2                   |             |
| SRR2101065      | L5.1.4                   |             |
| SRR2101293      | L5.1.1                   |             |
| SRR7496542      | unknown (new sublineage) | lacks RD711 |

|           |        |  |
|-----------|--------|--|
| SRR998585 | L5.1.1 |  |
| SRR998618 | L5.1.1 |  |

**Table S8. Accession numbers, country of origin and sequencing statistics of Illumina sequenced L5 genomes**

| G_NUMBER | AC_NUMBER                            | Country           | Avg. read depth | Std. read depth | % uncovered |
|----------|--------------------------------------|-------------------|-----------------|-----------------|-------------|
| G00183   | ERR234142                            | Ghana             | 80.93           | 39.07           | 2.27%       |
| G00188   | ERR234144                            | Ghana             | 76.54           | 29.9            | 1.65%       |
| G00193   | ERR234147                            | Ghana             | 83.46           | 27.11           | 0.47%       |
| G00196   | ERR234149                            | Ghana             | 87.75           | 28.61           | 0.63%       |
| G00410   | ERR841430                            | Liberia           | 82.95           | 17.69           | 0.81%       |
| G00731   | ERR4192047                           | Ghana             | 62.29           | 14.16           | 0.72%       |
| G00829   | ERR841494                            | South Africa      | 107.03          | 26.57           | 0.70%       |
| G00892   | ERR234199                            | Ghana             | 131.33          | 38.69           | 0.89%       |
| G00895   | ERR234202                            | Ghana             | 32.72           | 11.7            | 1.49%       |
| G00898   | ERR234204                            | Ghana             | 60.94           | 17.86           | 1.39%       |
| G01935   | ERR4192364                           | Nigeria           | 73.63           | 21.26           | 0.69%       |
| G01937   | ERR4192366                           | Nigeria           | 56.86           | 17.92           | 0.91%       |
| G01976   | ERR4192367                           | Equatorial Guinea | 105.69          | 46.37           | 0.55%       |
| G01977   | ERR4192368                           | Equatorial Guinea | 89.16           | 21.3            | 0.68%       |
| G01978   | ERR4192369                           | Equatorial Guinea | 91.39           | 25.77           | 0.57%       |
| G01979   | ERR4192370                           | Equatorial Guinea | 145.14          | 36.5            | 0.73%       |
| G01980   | ERR4192371                           | Equatorial Guinea | 61.55           | 30.86           | 0.57%       |
| G01981   | ERR4192372                           | Equatorial Guinea | 85.46           | 30.78           | 0.69%       |
| G01982   | ERR4192373                           | Equatorial Guinea | 68.64           | 34.69           | 0.73%       |
| G02691   | ERR4192380                           | Gambia            | 125.46          | 32.27           | 1.23%       |
| G03829   | ERR1334053                           | Ghana             | 96.04           | 17.71           | 0.94%       |
| G04163   | ERR1215478                           | Ghana             | 32.19           | 8.67            | 0.61%       |
| G04164   | ERR1215477                           | Ghana             | 50.23           | 10.28           | 0.58%       |
| G04165   | ERR1215476                           | Ghana             | 55.72           | 11.26           | 0.60%       |
| G04168   | ERR552345                            | Outside Africa    | 65.65           | 29.25           | 0.64%       |
| G07450   | ERR4192561;ERR4192562;<br>ERR4192563 | Ivory Coast       | 86.37           | 26.22           | 0.58%       |
| G08166   | ERR4192386;ERR4192407;<br>ERR4192544 | Equatorial Guinea | 61.68           | 20.98           | 0.73%       |
| G08388   | ERR1023216                           | Gambia            | 147.25          | 26.27           | 0.72%       |
| G08389   | ERR1023217                           | Gambia            | 141.73          | 27              | 0.89%       |
| G08390   | ERR1023218                           | Gambia            | 150.36          | 27.06           | 0.69%       |
| G08393   | ERR1023221                           | Gambia            | 154.28          | 31.33           | 1.09%       |
| G08395   | ERR1023223                           | Gambia            | 152.6           | 27.95           | 0.48%       |
| G08396   | ERR1023224                           | Gambia            | 146.32          | 31.4            | 0.64%       |

|        |            |             |        |       |       |
|--------|------------|-------------|--------|-------|-------|
| G08470 | ERR1082117 | Ghana       | 177.17 | 34.08 | 0.71% |
| G08472 | ERR1082120 | Ghana       | 178.32 | 42.5  | 0.57% |
| G08473 | ERR1082122 | Ghana       | 162.75 | 32.02 | 0.54% |
| G08476 | ERR1082125 | Ghana       | 176.1  | 46.33 | 0.59% |
| G08477 | ERR1082126 | Ghana       | 141.32 | 25.18 | 0.61% |
| G08480 | ERR1082129 | Ghana       | 188.23 | 28.52 | 0.56% |
| G08486 | ERR1082135 | Ghana       | 151.2  | 25.51 | 0.93% |
| G08488 | ERR1082137 | Ghana       | 160.3  | 26.42 | 0.81% |
| G08496 | ERR1203054 | Ghana       | 127.36 | 21.51 | 0.77% |
| G08500 | ERR1203057 | Ghana       | 119.35 | 22.27 | 0.56% |
| G08501 | ERR1203058 | Ghana       | 119.66 | 23.45 | 0.57% |
| G08502 | ERR1203059 | Ghana       | 112.83 | 19.47 | 0.59% |
| G08507 | ERR1203065 | Ghana       | 112.84 | 18.2  | 0.56% |
| G08508 | ERR1203066 | Ghana       | 124.55 | 19.6  | 0.57% |
| G08510 | ERR1203068 | Ghana       | 123.36 | 20.14 | 0.52% |
| G08511 | ERR1203069 | Ghana       | 112.67 | 20.24 | 0.94% |
| G08516 | ERR1203074 | Ghana       | 125.48 | 20.35 | 0.72% |
| G08541 | ERR439931  | Cameroon    | 79.93  | 13.46 | 0.05% |
| G08546 | ERR439936  | Guinea      | 83.16  | 14.05 | 0.51% |
| G08547 | ERR439937  | Benin       | 64.58  | 11.92 | 0.55% |
| G08549 | ERR439939  | Benin       | 57.11  | 11.07 | 0.60% |
| G08550 | ERR439940  | Benin       | 65.84  | 12.15 | 0.67% |
| G08551 | ERR439941  | Benin       | 67.66  | 11.61 | 0.41% |
| G08554 | ERR439944  | Benin       | 74.03  | 12.89 | 0.46% |
| G08557 | ERR439947  | Benin       | 64.2   | 11.79 | 0.50% |
| G08559 | ERR439949  | Benin       | 65.95  | 12.04 | 0.59% |
| G08561 | ERR439951  | Benin       | 78.95  | 14.69 | 1.16% |
| G08562 | ERR439952  | Benin       | 75.54  | 13.56 | 0.49% |
| G08563 | ERR439953  | Benin       | 70.79  | 12.12 | 0.60% |
| G08565 | ERR439955  | Benin       | 66.89  | 12.8  | 1.16% |
| G08569 | ERR439959  | Benin       | 60.49  | 13.01 | 1.11% |
| G08570 | ERR439960  | Benin       | 58.87  | 10.94 | 0.44% |
| G08572 | ERR439962  | Benin       | 62.57  | 11.35 | 0.63% |
| G08574 | ERR439964  | Benin       | 64.07  | 12.74 | 0.70% |
| G08577 | ERR439967  | Guinea      | 68.33  | 12.44 | 0.55% |
| G08590 | ERR439980  | Ivory Coast | 64.44  | 11.89 | 0.54% |
| G08592 | ERR439982  | Benin       | 53.23  | 10.36 | 0.74% |
| G08593 | ERR439983  | Benin       | 65.41  | 13.82 | 0.71% |
| G08594 | ERR439984  | Benin       | 70.69  | 13.36 | 0.57% |
| G08595 | ERR439985  | Benin       | 63.36  | 11.61 | 0.40% |
| G08609 | ERR460916  | Benin       | 93.26  | 16.62 | 0.45% |
| G08611 | ERR502471  | Ghana       | 79.03  | 13.94 | 0.63% |



|        |            |                |       |       |       |
|--------|------------|----------------|-------|-------|-------|
| G08612 | ERR502475  | Ghana          | 95.84 | 15.31 | 0.17% |
| G08616 | ERR502487  | Ghana          | 82.11 | 13.94 | 0.72% |
| G08619 | ERR702402  | Ghana          | 76.42 | 14.85 | 0.73% |
| G08622 | ERR502500  | Ghana          | 80.33 | 13.65 | 0.69% |
| G08623 | ERR502501  | Ghana          | 99.81 | 18.96 | 1.08% |
| G08627 | ERR502505  | Ghana          | 89.13 | 17.2  | 0.11% |
| G08631 | ERR502509  | Ghana          | 96.96 | 16.51 | 0.52% |
| G08632 | ERR502512  | Ghana          | 89.75 | 16.35 | 0.61% |
| G08633 | ERR502513  | Ghana          | 54.44 | 14.2  | 0.92% |
| G08635 | ERR502515  | Ghana          | 80.8  | 15.83 | 0.66% |
| G08652 | ERR502536  | Ghana          | 77.92 | 14.2  | 0.91% |
| G08656 | ERR1215473 | Ghana          | 47.9  | 11.37 | 0.55% |
| G08660 | ERR702407  | Ghana          | 74.28 | 14.65 | 0.54% |
| G08664 | ERR702411  | Ghana          | 76.88 | 15.2  | 0.69% |
| G08666 | ERR702413  | Ghana          | 75.3  | 12.3  | 0.52% |
| G08669 | ERR702416  | Ghana          | 75.09 | 16.34 | 0.56% |
| G08670 | ERR702417  | Ghana          | 80.41 | 15.1  | 0.54% |
| G08672 | ERR702419  | Ghana          | 77.66 | 12.49 | 0.51% |
| G08679 | ERR702426  | Ghana          | 74.15 | 12.52 | 0.54% |
| G08695 | ERR751295  | Ghana          | 86.88 | 17.5  | 0.92% |
| G08699 | ERR751299  | Ghana          | 84.94 | 16.75 | 0.56% |
| G08701 | ERR751301  | Ghana          | 81.22 | 14.65 | 0.54% |
| G08702 | ERR751302  | Ghana          | 87.89 | 16.87 | 0.70% |
| G08703 | ERR751303  | Ghana          | 83.14 | 15.78 | 0.54% |
| G08704 | ERR751304  | Ghana          | 92.78 | 18.52 | 0.74% |
| G08708 | ERR751308  | Ghana          | 77.59 | 13.77 | 0.39% |
| G08710 | ERR751310  | Ghana          | 55.2  | 16.93 | 0.65% |
| G08711 | ERR751311  | Ghana          | 80.87 | 14.44 | 0.50% |
| G08712 | ERR751312  | Ghana          | 83.18 | 16.82 | 0.38% |
| G08713 | ERR751313  | Ghana          | 77.85 | 15.8  | 0.60% |
| G08715 | ERR751315  | Ghana          | 82.84 | 13.98 | 0.55% |
| G08721 | ERR751323  | Ghana          | 89.55 | 14.95 | 0.68% |
| G08723 | ERR751327  | Ghana          | 67.08 | 11.91 | 0.56% |
| G08724 | ERR751328  | Ghana          | 65.72 | 12.13 | 0.56% |
| G08730 | ERR751334  | Ghana          | 86.4  | 16.54 | 0.60% |
| G08731 | ERR751335  | Ghana          | 75.31 | 13.26 | 0.64% |
| G08735 | ERR751339  | Ghana          | 49.43 | 9.68  | 0.58% |
| G08741 | ERR751345  | Ghana          | 69.72 | 12.98 | 0.54% |
| G08743 | ERR751348  | Ghana          | 92.05 | 16.94 | 0.91% |
| G08848 | ERR1215463 | Ghana          | 44.99 | 9.31  | 0.52% |
| G08913 | ERR019875  | Outside Africa | 29.23 | 11.6  | 1.64% |
| G08917 | ERR234679  | Outside Africa | 126.4 | 20.86 | 0.85% |

|        |            |                                  |        |       |       |
|--------|------------|----------------------------------|--------|-------|-------|
| G08918 | ERR234680  | Outside Africa                   | 116.97 | 19.1  | 0.51% |
| G08920 | ERR551566  | Sierra Leone                     | 64.74  | 17.79 | 0.77% |
| G08934 | SRR998585  | Mali                             | 151.95 | 32.17 | 0.12% |
| G11003 | SRR998618  | Mali                             | 151.66 | 36.31 | 0.32% |
| G11556 | ERR3170399 | Ghana                            | 52.65  | 14.83 | 0.86% |
| G11565 | ERR3170440 | Ghana                            | 86.9   | 21.54 | 0.77% |
| G11566 | ERR3170441 | Ghana                            | 44.99  | 13.94 | 1.19% |
| G11568 | ERR4162017 | Gabon                            | 59.41  | 16.96 | 0.74% |
| G11575 | ERR551089  | Sierra Leone                     | 66.53  | 19.82 | 1.12% |
| G11578 | ERR3170443 | Ghana                            | 67.25  | 17.96 | 0.71% |
| G11579 | ERR551857  | Sierra Leone                     | 61.23  | 17.31 | 0.76% |
| G11591 | ERR3170456 | Ghana                            | 105.34 | 25.94 | 0.66% |
| G11595 | ERR3170460 | Ghana                            | 45.89  | 12.79 | 1.01% |
| G11597 | ERR3170463 | Ghana                            | 42.7   | 12.71 | 0.70% |
| G11598 | ERR3170464 | Ghana                            | 122.54 | 34.01 | 0.85% |
| G11600 | ERR3170466 | Ghana                            | 113.82 | 36.95 | 0.77% |
| G11604 | ERR3170471 | Ghana                            | 47.59  | 13.62 | 1.02% |
| G11605 | ERR552588  | Ghana                            | 73.32  | 20.22 | 1.06% |
| G11607 | ERR3170473 | Ghana                            | 49.4   | 13.09 | 1.02% |
| G11608 | ERR3170474 | Ghana                            | 91.38  | 23.93 | 0.69% |
| G11609 | ERR3170475 | Ghana                            | 51.37  | 16.02 | 0.76% |
| G11610 | ERR3170476 | Ghana                            | 65.15  | 18.85 | 0.71% |
| G11611 | ERR3170477 | Ghana                            | 43.03  | 11.35 | 0.72% |
| G11614 | ERR3170480 | Ghana                            | 67.64  | 23.17 | 0.83% |
| G11619 | ERR3170483 | Ghana                            | 71.16  | 19.26 | 0.58% |
| G11620 | ERR3170484 | Ghana                            | 105.94 | 26.91 | 0.75% |
| G11626 | ERR3170490 | Ghana                            | 104.41 | 24.65 | 0.67% |
| G11627 | ERR3170491 | Ghana                            | 49.54  | 13.68 | 0.73% |
| G11631 | ERR4162025 | Gabon                            | 56.05  | 15.47 | 0.90% |
| G11632 | ERR4162026 | Gabon                            | 102.51 | 29.46 | 0.85% |
| G11633 | ERR4162027 | Gabon                            | 117.26 | 31.58 | 0.68% |
| G11637 | ERR3148046 | Ghana                            | 81.18  | 21    | 0.50% |
| G11639 | ERR4162032 | Democratic Republic of the Congo | 81.46  | 20.79 | 0.63% |
| G11643 | ERR3170404 | Ghana                            | 104.28 | 28.22 | 0.96% |
| G11646 | ERR3170407 | Ghana                            | 49.53  | 15.96 | 0.82% |
| G11649 | ERR552187  | Ghana                            | 68.92  | 19.83 | 0.96% |
| G11654 | ERR3170413 | Ghana                            | 75.04  | 20.49 | 0.87% |
| G11655 | ERR4162000 | Gabon                            | 75.66  | 20.02 | 0.88% |
| G11656 | ERR4162001 | Gabon                            | 83.32  | 23.6  | 0.56% |
| G11657 | ERR4162002 | Gabon                            | 133.3  | 35.31 | 0.72% |

|        |             |                       |        |       |       |
|--------|-------------|-----------------------|--------|-------|-------|
| G11658 | ERR551336   | Sierra Leone          | 64.78  | 17.85 | 0.78% |
| G11659 | ERS4575215  | Gabon                 | 95.25  | 23.79 | 0.83% |
| G11660 | ERR4162005  | Gabon                 | 79.69  | 21.03 | 0.88% |
| G11661 | ERR3170414  | Ghana                 | 56.8   | 14.98 | 0.97% |
| G11663 | ERR4162006  | Gabon                 | 97.1   | 27.08 | 0.69% |
| G11666 | ERR3170417  | Ghana                 | 66.83  | 16.98 | 0.78% |
| G11667 | ERR3170418  | Ghana                 | 64.88  | 16.11 | 0.80% |
| G11668 | ERR3170419  | Ghana                 | 89.74  | 23.14 | 0.71% |
| G11671 | ERR3170422  | Ghana                 | 117.23 | 28.65 | 0.65% |
| G11672 | ERR3170423  | Ghana                 | 104.37 | 28.35 | 0.72% |
| G11674 | ERR3170424  | Ghana                 | 117.45 | 32.15 | 0.72% |
| G11679 | ERR3170428  | Ghana                 | 47.74  | 13.31 | 1.15% |
| G11683 | ERR552506   | Ghana                 | 57.64  | 18.39 | 1.16% |
| G11685 | ERR4162007  | Gabon                 | 119.87 | 32.72 | 0.80% |
| G11693 | ERR3170434  | Ghana                 | 175.53 | 43.2  | 0.58% |
| G11696 | ERR552261   | Sierra Leone          | 63.95  | 18.67 | 0.85% |
| G11698 | ERR3148058  | Gabon                 | 167.21 | 46.01 | 0.67% |
| G11700 | ERR551005   | Republic of the Congo | 69.42  | 17.32 | 0.74% |
| G11701 | ERR551124   | Republic of the Congo | 69.8   | 17.67 | 0.85% |
| G11702 | ERR552673   | Republic of the Congo | 64.88  | 18.67 | 1.15% |
| G11703 | ERR550904   | Republic of the Congo | 122.71 | 31.58 | 0.67% |
| G11704 | ERR552285   | Republic of the Congo | 64.04  | 16.89 | 0.68% |
| G11706 | ERR3170488  | Ghana                 | 90.82  | 29.02 | 0.61% |
| G14330 | SRR2100183  | Outside Africa        | 65.57  | 12.1  | 0.54% |
| G14855 | SRR2100713  | Outside Africa        | 51.05  | 12.71 | 0.33% |
| G15178 | SRR2101040  | Outside Africa        | 68.07  | 13.78 | 0.47% |
| G15201 | SRR2101063  | Outside Africa        | 55.9   | 13.93 | 0.75% |
| G15203 | SRR2101065  | Outside Africa        | 51.53  | 11.67 | 0.68% |
| G15430 | SRR2101293  | Outside Africa        | 55.26  | 12.58 | 0.62% |
| G22215 | ERR2704692  | Ghana                 | 55.29  | 14.56 | 0.63% |
| G25357 | ERR550904   | Republic of the Congo | 122.71 | 31.58 | 0.67% |
| G26731 | SRR11444083 | Ghana                 | 55.19  | 11.16 | 0.63% |
| G26738 | SRR11444026 | Ghana                 | 47.69  | 9.74  | 0.67% |
| G26749 | SRR11444232 | Ghana                 | 62.94  | 10.52 | 0.42% |
| G26805 | SRR11444206 | Ghana                 | 69.52  | 12.03 | 0.55% |
| G32940 | ERR2383619  | Cameroon              | 115.01 | 28.88 | 0.81% |

|        |            |                |        |       |       |
|--------|------------|----------------|--------|-------|-------|
| G32941 | ERR2383620 | Cameroon       | 149.11 | 35.82 | 0.79% |
| G32942 | ERR2383621 | Ivory Coast    | 89.61  | 20.8  | 0.57% |
| G32943 | ERR2383622 | Outside Africa | 82.08  | 21.12 | 0.51% |
| G32944 | ERR2383623 | Outside Africa | 69.76  | 18.79 | 0.88% |
| G32945 | ERR2383624 | Outside Africa | 83.77  | 22.73 | 0.86% |
| G32946 | ERR2383625 | Outside Africa | 92.66  | 24.9  | 0.72% |
| G32947 | ERR2383626 | Outside Africa | 82.86  | 20.7  | 0.54% |
| G32950 | ERR2704808 | Ivory Coast    | 327.61 | 42.04 | 0.60% |
| G32951 | ERR2704809 | Cameroon       | 316.26 | 40.72 | 0.58% |
| G32952 | ERR2704810 | Cameroon       | 329.55 | 40.39 | 0.41% |
| G32954 | ERR2704812 | Cameroon       | 378.7  | 59.3  | 1.35% |
| G33338 | SRR7496542 | Outside Africa | 146.46 | 25.1  | 0.46% |
